# Supplementary material for: Correction: Hyporheic hydraulic geometry: Conceptualizing relationships among hyporheic exchange, storage, and water age
Source: PubMed Central journal article supplement (PMC11318846; doi:10.1371/journal.pone.0308936), 2024-08-12
Supplement: pone.0308936.s001.pdf [file pone.0308936.s001.pdf]

## Supporting information

**S1 Appendix.** Assuming the water age distribution follows a power law with a minimum water age  $\tau_0$  and a maximum water age  $\tau_n$  (using Eq 12 from the main text as the definition of  $f(\tau)$ ), the solution for  $E(\tau)$  is:

$$E(\tau) = \frac{(\tau^{-\alpha} - \tau_n^{-\alpha})(-\alpha + 1)}{\tau_n^{-\alpha+1} - \tau_0^{-\alpha+1} - \tau_n^{-\alpha}(\tau_n - \tau_0)(-\alpha + 1)}. \quad (1)$$

The solution for  $W(\tau)$  is:

$$W(\tau) = \frac{(\tau_n^{-\alpha+1} - \tau^{-\alpha+1}) - \tau_n^{-\alpha}(\tau_n - \tau)(-\alpha + 1)}{(\tau_n^{-\alpha+1} - \tau_0^{-\alpha+1}) - \tau_n^{-\alpha}(\tau_n - \tau_0)(-\alpha + 1)}. \quad (2)$$

The solution for the integral in Eq 9 (which can be used to solve Eq 7) is:

$$\int_{\tau_a}^{\tau_b} W(\tau) d\tau = \frac{\frac{\tau_n^{-\alpha}(-\alpha+1)(\tau_b^2 - \tau_a^2)}{2} - \frac{(\tau_b^{-\alpha+2} - \tau_a^{-\alpha+2})}{-\alpha+2} - \tau_n^{-\alpha+1}(\tau_b - \tau_a)(-\alpha)}{(\tau_n^{-\alpha+1} - \tau_0^{-\alpha+1}) - \tau_n^{-\alpha}(\tau_n - \tau_0)(-\alpha + 1)}. \quad (3)$$

Assuming the water age distribution follows an exponential function:

$$f(\tau) = e^{-\sigma\tau} - e^{-\sigma\tau_n} \quad (4)$$

the solution for  $E(\tau)$  is:

$$E(\tau) = \frac{\sigma(e^{-\sigma\tau} - e^{-\sigma\tau_n})}{e^{-\sigma\tau_n}(e^{-\sigma(\tau_0 - \tau_n)} - \sigma(\tau_n - \tau_0) - 1)}. \quad (5)$$

The solution for  $W(\tau)$  is:

$$W(\tau) = \frac{e^{-\sigma(\tau - \tau_n)} - \sigma(\tau_n - \tau) - 1}{e^{-\sigma(\tau_0 - \tau_n)} - \sigma(\tau_n - \tau_0) - 1} \quad (6)$$

The solution for the integral in Eq 9 (which can be used to solve Eq 7) is:

$$\int_{\tau_{i-1}}^{\tau_i} W(\tau) = \frac{\sigma(\tau_a - \tau_b) + e^{-\sigma(\tau_{i-1} - \tau_n)} - e^{-\sigma(\tau_i - \tau_n)}}{e^{-\sigma(\tau_0 - \tau_n)} - \sigma(\tau_n - \tau_0) - 1} \quad (7)$$
